# Supplementary material for: Pre-Pregnancy Obesity, Excessive Gestational Weight Gain, and the Risk of Pregnancy-Induced Hypertension and Gestational Diabetes Mellitus
Source: MDPI journal article supplement (doi:10.3390/jcm9061980), 2020-06-24
Supplement: s1 [file s1]

## Supplementary Materials

**Table S1.** General characteristics in the mothers with hypertension or diabetes in pregnancy.

| Maternal characteristics               | Controls                   |  | Cases                    | p *      |
|----------------------------------------|----------------------------|--|--------------------------|----------|
|                                        | Mean (SD); Median/ n (%)   |  | Mean (SD); Median/ n (%) |          |
|                                        | Normotensives (n = 775)    |  | GH cases (n = 113)       |          |
| Maternal age (years)                   | 33.5 (4.8); 35.0           |  | 35.0 (4.3); 36.0         | 0.005    |
| Primiparous                            | 318 (41.0%)                |  | 53 (46.9%)               | 0.237    |
| Hypertension in previous pregnancy     | 4 (0.5%)                   |  | 12 (10.6%)               | <0.00001 |
| Infertility treatment                  | 29 (3.7%)                  |  | 8 (7.1%)                 | 0.097    |
| Smokers in the first trimester         | 37 (4.8%)                  |  | 17 (15.0%)               | 0.00002  |
| Pre-pregnancy BMI (kg/m <sup>2</sup> ) | 23.3 (4.1); 22.5           |  | 26.7 (5.3); 25.5         | < 0.001  |
| GWG (kg)                               | 13.4 (5.3); 13.0           |  | 14.6 (8); 14.0           | 0.115    |
| Gestational age at delivery (week)     | 38.9 (1.6); 39.0           |  | 38.3 (2.2); 39.0         | 0.016    |
| Newborn birthweight (g)                | 3416.5 (511.7); 3449.0     |  | 3174.1 (734.3); 3200.0   | 0.001    |
| Gestational diabetes mellitus          | 121 (15.6%)                |  | 22 (19.5%)               | 0.298    |
|                                        | Normotensives (n = 775)    |  | PE cases (n = 24)        |          |
| Maternal age (years)                   | 33.5 (4.8); 35.0           |  | 34.1 (5.0); 35.0         | 0.434    |
| Primiparous                            | 318 (41.0%)                |  | 12 (50.0%)               | 0.380    |
| Hypertension in previous pregnancy     | 4 (0.5%)                   |  | 3 (12.5%)                | <0.00001 |
| Infertility treatment                  | 29 (3.7%)                  |  | 3 (12.5%)                | 0.031    |
| Smokers in the first trimester         | 37 (4.8%)                  |  | 3 (12.5%)                | 0.084    |
| Pre-pregnancy BMI (kg/m <sup>2</sup> ) | 23.3 (4.1); 22.5           |  | 26.5 (6.2); 25.0         | 0.008    |
| GWG (kg)                               | 13.4 (5.3); 13.0           |  | 15.1(8.2); 14.3          | 0.612    |
| Gestational age at delivery (week)     | 38.9 (1.6); 39.0           |  | 35.1 (3.7); 36.0         | < 0.001  |
| Newborn birthweight (g)                | 3416.5 (511.7); 3449.0     |  | 2294.2 (927.5); 2445.0   | < 0.001  |
| Gestational diabetes mellitus          | 121 (15.6%)                |  | 3 (12.5%)                | 0.678    |
| PE beginning ≥34th week                | -                          |  | 13 (54.2%)               | -        |
|                                        | Without diabetes (n = 766) |  | Diabetes GDM-1 (n = 125) |          |
| Maternal age (years)                   | 33.5 (4.8); 34.0           |  | 35.1 (4.3); 36.0         | <0.001   |
| Primiparous                            | 318 (41.5%)                |  | 59 (47.2%)               | 0.233    |
| Diabetes in previous pregnancy         | 3 (0.4%)                   |  | 3 (2.4%)                 | 0.039    |
| Pre-pregnancy BMI (kg/m <sup>2</sup> ) | 23.5 (4.2); 22.6           |  | 25.0 (5.2); 23.9         | 0.004    |
| GWG (kg)                               | 14.1 (5.5); 14.0           |  | 11.2 (6.7); 11.0         | <0.001   |
| Gestational age at delivery (week)     | 38.7 (2.0); 39.0           |  | 38.7(1.5); 39.0          | 0.125    |
| Newborn birthweight (g)                | 3347.2 (588.3); 3400.0     |  | 3416.1 (547.8); 3400.0   | 0.470    |
| Pregnancy-induced hypertension         | 112 (14.6%)                |  | 20 (16.0%)               | 0.687    |
|                                        | Without diabetes (n = 766) |  | Diabetes GDM-2 (n = 21)  |          |
| Maternal age (years)                   | 33.5 (4.8); 34.0           |  | 34.9 (4.4); 36.0         | 0.176    |
| Primiparous                            | 318 (41.5%)                |  | 5 (23.8%)                | 0.104    |
| Diabetes in previous pregnancy         | 3 (0.4%)                   |  | 5 (23.8%)                | <0.001   |
| Prepregnancy BMI (kg/m <sup>2</sup> )  | 23.5 (4.2); 22.6           |  | 27.9 (7.0); 28.0         | 0.003    |
| GWG (kg)                               | 14.1 (5.5); 14.0           |  | 9.0 (5.0); 9.0           | <0.001   |
| Gestational age at delivery (week)     | 38.7 (2.0); 39.0           |  | 38.0 (2.2); 38.0         | 0.037    |
| Newborn birthweight (g)                | 3347.2 (588.3); 3400.0     |  | 3358.6 (837.8); 3300.0   | 0.771    |
| Pregnancy-induced hypertension         | 112 (14.6%)                |  | 5 (23.8%)                | 0.222    |

\* The Mann–Whitney U test was used for comparisons of continuous variables, and the Pearson chi-square test (or Fisher exact test when Cochran assumption was not met) was used for binomial categories (p<0.05 was assumed to be significant); GH, gestational hypertension; PE, preeclampsia; GDM-1, gestational diabetes with dietary modification; GDM-2, gestational diabetes with insulin therapy; BMI, body mass index; GWG, gestational weight gain.

**Table S2.** Multivariate relationships between excessive pre-pregnancy BMI and adverse newborn outcomes.

| <b>The Odds Ratios of Incorrect Birth Weight for Excessive BMI</b> |                            |                              |                                       |
|--------------------------------------------------------------------|----------------------------|------------------------------|---------------------------------------|
|                                                                    | <b>Cases/<br/>Controls</b> | <b>OR (95% CI); <i>p</i></b> | <b>AOR-c * (95% CI);<br/><i>p</i></b> |
| Birth weight >90th percentile **                                   |                            |                              |                                       |
| Pre-pregnancy BMI ≥25 kg/m <sup>2</sup>                            | 47/201                     | 2.46 (1.59–3.79); <0.001     | 1.69 (1.05–2.73); 0.031               |
| Normal BMI (18.5–24.99 kg/m <sup>2</sup> )                         | 48/504                     | 1                            | 1                                     |
| Birth weight >4000 g ***                                           |                            |                              |                                       |
| Pre-pregnancy BMI ≥25 kg/m <sup>2</sup>                            | 49/197                     | 2.93 (1.89–4.54); <0.001     | 1.83 (1.12–3.01); 0.016               |
| Normal BMI (18.5–24.99 kg/m <sup>2</sup> )                         | 44/518                     | 1                            | 1                                     |
| Birth weight <10th percentile **                                   |                            |                              |                                       |
| Pre-pregnancy BMI ≥25 kg/m <sup>2</sup>                            | 23/201                     | 1.37 (0.81–2.34); 0.245      | 1.17 (0.64–2.13); 0.62                |
| Normal BMI (18.5–24.99 kg/m <sup>2</sup> )                         | 42/504                     | 1                            | 1                                     |
| Birth weight <2500 g ***                                           |                            |                              |                                       |
| Pre-pregnancy BMI ≥25 kg/m <sup>2</sup>                            | 25/197                     | 2.05 (1.19–3.55); 0.01       | 1.60 (0.67–3.86); 0.293               |
| Normal BMI (18.5–24.99 kg/m <sup>2</sup> )                         | 32/518                     | 1                            | 1                                     |
| Birth <37th week ** **                                             |                            |                              |                                       |
| Pre-pregnancy BMI ≥25 kg/m <sup>2</sup>                            | 24/247                     | 1.46 (0.86–2.5); 0.164       | 1.62 (0.87–3); 0.126                  |
| Normal BMI (18.5–24.99 kg/m <sup>2</sup> )                         | 37/557                     | 1                            | 1                                     |
| Birth <34th week ** **                                             |                            |                              |                                       |
| Pre-pregnancy BMI ≥25 kg/m <sup>2</sup>                            | 11/260                     | 2.47 (1.04–5.89); 0.041      | 3.22 (1.14–9.12); 0.028               |
| Normal BMI (18.5–24.99 kg/m <sup>2</sup> )                         | 10/584                     | 1                            | 1                                     |

\* AOR (adjusted odds ratios) (CI, confidence intervals) were calculated in the multivariate logistic regression, and the p-value was calculated using the Wald test (p<0.05 was assumed to be significant).

\*\* AOR-c: The analysis covered cases and newborns within 10th–90th percentile, and the odds ratios were adjusted for maternal age, primiparous, GWG above the range of the IOM recommendation, smoking in the first trimester, maternal height, fetal sex, pre-eclampsia in present pregnancy, and diabetes mellitus in present pregnancy. \*\*\* AOR-c: The analysis covered cases and newborns within 2500–4000 g, and the odds ratios were adjusted for maternal age, primiparous, GWG above the range of the IOM recommendation, smoking in the first trimester, maternal height, fetal sex, pre-eclampsia in present pregnancy, diabetes mellitus in present pregnancy, and gestational age at delivery. \*\*\*\*

AOR-c: The analysis covered cases and births ≥37th week, and the odds ratios were adjusted for maternal age, primiparous, GWG above the range of the IOM recommendation, smoking in the first trimester, fetal sex, pre-eclampsia in present pregnancy, cesarean section, and premature rupture of membranes;. BMI, body mass index; GWG, gestational weight gain defined in accordance with the recommendations of Institute of Medicine (IOM) from 2009.

**Table S3.** The adjusted odds ratios of GH, PE, GDM-1, and GDM-2 for categories of maternal weight, in the subgroups.

|                                         | Cases/<br>Controls | In the Whole<br>Cohort<br>OR (95% CI); <i>p</i> | The Odds Ratios of Hypertension and Diabetes<br>in Pregnancy |                                                   |
|-----------------------------------------|--------------------|-------------------------------------------------|--------------------------------------------------------------|---------------------------------------------------|
|                                         |                    |                                                 | In the Whole Cohort<br>AOR-c (95% CI); <i>p</i><br>**        | In the Subgroups *<br>AOR-c (95% CI); <i>p</i> ** |
| <b>Gestational hypertension (GH)***</b> |                    |                                                 |                                                              |                                                   |
| OBESITY                                 | 31/58              | 5.60 (3.32–9.43);<br><0.001                     | 4.94 (2.77–8.81);<br><0.001                                  | 8.21 (2.47–27.26); 0.001                          |
| Overweight                              | 30/139             | 2.26 (1.39–3.68);<br>0.001                      | 2.09 (1.21–3.60); 0.008                                      | 5.81 (2.11–15.99); 0.001                          |
| Underweight                             | 1/44               | 0.24 (0.03–1.76); 0.16                          | 0.29 (0.04–2.17); 0.226                                      | NA                                                |
| Normal pre-pregnancy<br>BMI             | 51/534             | 1                                               | 1                                                            | 1                                                 |
| GWG above the range                     | 62/263             | 2.45 (1.53–3.92);<br><0.001                     | 1.71 (1.01–2.89); 0.045                                      | 3.00 (1.39–6.49); 0.005                           |
| GWG in the range                        | 29/301             | 1                                               | 1                                                            | 1                                                 |
| <b>Preeclampsia (PE)***</b>             |                    |                                                 |                                                              |                                                   |
| OBESITY                                 | 9/58               | 9.21 (3.52–24.11);<br><0.001                    | 8.61(3.1–24.36);<br><0.001                                   | 21.06 (2.82–157.23); 0.003                        |
| Overweight                              | 4/139              | 1.71 (0.52–5.63);<br>0.379                      | 1.91 (0.53–6.87); 0.324                                      | 3.65 (0.3–44.29); 0.310                           |
| Underweight                             | 2/44               | 2.70 (0.57–12.87);<br>0.213                     | 2.95(0.57–15.16); 0.195                                      | 11.27(1.18–107.36); 0.035                         |
| Normal pre-pregnancy<br>BMI             | 9/534              | 1                                               | 1                                                            | 1                                                 |
| GWG above the range                     | 11/263             | 1.57 (0.62–3.97);<br>0.337                      | 1.14 (0.41–3.12); 0.803                                      | 3.15 (0.52–19.1); 0.211                           |
| GWG in the range                        | 8/301              | 1                                               | 1                                                            | 1                                                 |
| <b>Diabetes GDM-1 ** **</b>             |                    |                                                 |                                                              |                                                   |
| OBESITY                                 | 25/66              | 2.75 (1.63–4.64);<br><0.001                     | 2.99(1.71–5.25);<br><0.001                                   | 2.69 (0.87–8.25); 0.085                           |
| Overweight                              | 21/147             | 1.04 (0.62–1.74);<br>0.893                      | 1.24 (0.71–2.14); 0.452                                      | 1.93 (0.79–4.70); 0.150                           |
| Underweight                             | 8/38               | 1.53 (0.69–3.41);<br>0.301                      | 1.53 (0.66–3.52); 0.322                                      | 1.52 (0.39–5.92); 0.544                           |
| Normal pre-pregnancy<br>BMI             | 71/515             | 1                                               | 1                                                            | 1                                                 |
| GWG above the range                     | 33/298             | 0.83 (0.51–1.36);<br>0.454                      | 0.74 (0.44–1.24); 0.245                                      | 0.69 (0.33–1.47); 0.339                           |
| GWG in the range                        | 39/292             | 1                                               | 1                                                            | 1                                                 |
| <b>Diabetes GDM-2 ** **</b>             |                    |                                                 |                                                              |                                                   |
| OBESITY                                 | 7/66               | 6.83 (2.4–19.44);<br><0.001                     | 11.88(3.7–38.5);<br><0.001                                   | 35.84 (4.2–303.1); 0.001                          |
| Overweight                              | 5/147              | 2.19 (0.71–6.79);<br>0.175                      | 2.29 (0.58–9.06); 0.238                                      | 4.51 (0.46–44.68); 0.198                          |
| Underweight                             | 1/38               | 1.69 (0.21–13.9);<br>0.624                      | 2.66 (0.3–23.74); 0.381                                      | NA                                                |
| Normal pre-pregnancy<br>BMI             | 8/515              | 1                                               | 1                                                            | 1                                                 |
| GWG above the range                     | 5/298              | 0.70 (0.22–2.23);<br>0.546                      | 0.76 (0.21–2.77); 0.672                                      | 1.13 (0.07–19.08); 0.930                          |
| GWG in the range                        | 7/292              | 1                                               | 1                                                            | 1                                                 |

\* The analyses of pre-pregnancy BMI were conducted in the subgroup of GWG in the range of the IOM recommendations, and the analyses of GWG were carried out in the subgroup of pre-pregnancy

BMI in the norm. \*\* adjusted odds ratios (CI, confidence intervals) were calculated in the multivariate logistic regression, and the p-value was calculated using the Wald test ( $p < 0.05$  was assumed to be significant). \*\*\* AOR-c: The odds ratios were adjusted for maternal age, primiparous, GWG above the range of the recommendation (in the analyses of BMI) or pre-pregnancy BMI (in the analyses of GWG), smoking, hypertension in previous pregnancy, and infertility treatment. \*\*\*\* AOR-c: The odds ratios were adjusted for maternal age, primiparous, GWG above the range of the recommendation (in the analyses of BMI) or pre-pregnancy BMI (in the analyses of GWG), and diabetes in previous pregnancy. GDM-1, gestational diabetes with dietary modification; GDM-2, gestational diabetes with insulin therapy; BMI, body mass index; GWG, gestational weight gain defined in accordance with the recommendations of Institute of Medicine (IOM) from 2009. NA: data not available (no case).

**Table S4.** The adjusted odds ratios of GH, PE, GDM-1, and GDM-2 for categories of maternal weight, in model with maternal edema.

|                                      | Cases/<br>Controls | OR (95% CI); <i>p</i>     | The Odds Ratios of Hypertension and Diabetes in Pregnancy |                            |
|--------------------------------------|--------------------|---------------------------|-----------------------------------------------------------|----------------------------|
|                                      |                    |                           | AOR-a* (95% CI); <i>p</i>                                 | AOR-b** (95% CI); <i>p</i> |
| <b>Gestational hypertension (GH)</b> |                    |                           |                                                           |                            |
| Obesity                              | 31/58              | 5.60 (3.32–9.43); <0.001  | 4.41 (2.55–7.61); <0.001                                  | 4.45 (2.57–7.70); <0.001   |
| Overweight                           | 30/139             | 2.26 (1.39–3.68); 0.001   | 1.82 (1.09–3.05); 0.022                                   | 1.88 (1.12–3.15); 0.017    |
| Underweight                          | 1/44               | 0.24 (0.03–1.76); 0.16    | 0.27 (0.04–2.03); 0.204                                   | 0.25 (0.03–1.91); 0.182    |
| Normal pre-pregnancy BMI             | 51/534             | 1                         | 1                                                         | 1                          |
| GWG above the range                  | 62/263             | 2.45 (1.53–3.92); <0.001  | 2.00 (1.22–3.29); 0.006                                   | 1.86 (1.13–3.08); 0.015    |
| GWG in the range                     | 29/301             | 1                         | 1                                                         | 1                          |
| <b>Preeclampsia (PE)</b>             |                    |                           |                                                           |                            |
| OBESITY                              | 9/58               | 9.21 (3.52–24.11); <0.001 | 8.38 (3.1–22.66); <0.001                                  | 7.53 (2.69–21.05); <0.001  |
| Overweight                           | 4/139              | 1.71 (0.52–5.63); 0.379   | 1.53 (0.44–5.30); 0.499                                   | 1.67 (0.48–5.83); 0.425    |
| Underweight                          | 2/44               | 2.70 (0.57–12.87); 0.213  | 2.81 (0.57–13.79); 0.204                                  | 2.33 (0.45–12.04); 0.312   |
| Normal pre-pregnancy BMI             | 9/534              | 1                         | 1                                                         | 1                          |
| GWG above the range                  | 11/263             | 1.57 (0.62–3.97); 0.337   | 1.31 (0.51–3.40); 0.575                                   | 0.92 (0.34–2.52); 0.872    |
| GWG in the range                     | 8/301              | 1                         | 1                                                         | 1                          |
| <b>Gestational diabetes GDM-1</b>    |                    |                           |                                                           |                            |
| OBESITY                              | 25/66              | 2.75 (1.63–4.64); <0.001  | 3.05 (1.74–5.33); <0.001                                  | 3.04 (1.74–5.33); <0.001   |
| Overweight                           | 21/147             | 1.04 (0.62–1.74); 0.893   | 1.25 (0.72–2.16); 0.426                                   | 1.25 (0.72–2.16); 0.423    |
| Underweight                          | 8/38               | 1.53 (0.69–3.41); 0.301   | 1.61 (0.70–3.66); 0.26                                    | 1.61 (0.70–3.66); 0.260    |
| Normal pre-pregnancy BMI             | 71/515             | 1                         | 1                                                         | 1                          |
| GWG above the range                  | 33/298             | 0.83 (0.51–1.36); 0.454   | 0.70 (0.42–1.17); 0.176                                   | 0.68 (0.40–1.15); 0.147    |
| GWG in the range                     | 39/292             | 1                         | 1                                                         | 1                          |

| Gestational diabetes<br>GDM-2 |       |                             |                          |                           |
|-------------------------------|-------|-----------------------------|--------------------------|---------------------------|
| OBESITY                       | 7/66  | 6.83 (2.4–19.44);<br><0.001 | 8.48(2.87–25.01); <0.001 | 8.19 (2.76–24.26); <0.001 |
| Overweight                    | 5/147 | 2.19 (0.71–6.79);<br>0.175  | 3.04 (0.93–9.91); 0.065  | 3.07 (0.94–10.00); 0.063  |
| Underweight                   | 1/38  | 1.69 (0.21–13.9);<br>0.624  | 1.87 (0.22–15.82); 0.567 | 1.85 (0.22–15.74); 0.572  |
| Normal pre-pregnancy<br>BMI   | 8/515 | 1                           | 1                        | 1                         |
| GWG above the range           | 5/298 | 0.70 (0.22–2.23);<br>0.546  | 0.53 (0.16–1.73); 0.290  | 0.55 (0.17–1.81); 0.325   |
| GWG in the range              | 7/292 | 1                           | 1                        | 1                         |

AOR (adjusted odds ratios) (CI, confidence intervals) were calculated in the multivariate logistic regression, and the p-value was calculated using the Wald test (p<0.05 was assumed to be significant).

\* AOR-a: The odds ratios were adjusted for maternal age, primiparous, and GWG above the range of the recommendation (in the analyses of BMI) or pre-pregnancy BMI (in the analyses of GWG). \*\*

AOR-b: The odds ratios were adjusted for maternal edema, maternal age, primiparous, and GWG above the range of the recommendation (in the analyses of BMI) or pre-pregnancy BMI (in the analyses of GWG). GDM-1, gestational diabetes with dietary modification; GDM-2, gestational diabetes with insulin therapy; BMI, body mass index; GWG, gestational weight gain defined in accordance with the recommendations of Institute of Medicine (IOM) from 2009.
